# Supplementary material for: Single metal atoms supported on N-doped 2D M2C MXenes: an efficient electrocatalyst for overall water splitting
Source: Royal Society of Chemistry journal article supplement (doi:10.1039/d3nj02915h), 2023-01-01
Supplement: d3nj02915h1.pdf [file d3nj02915h1.pdf]

## Supplementary Information

### Single metal atom supported on N-doped 2D M<sub>2</sub>C MXenes: an efficient electrocatalyst for overall water splitting

Mengyue Li<sup>a</sup>, Yuwen Cheng<sup>a,b,\*</sup>, Yongtao Li<sup>a,b,\*</sup>

<sup>a</sup> School of Materials Science and Engineering, Anhui University of Technology, Maanshan 243002, PR China

<sup>b</sup> Key Laboratory of Green Fabrication and Surface Technology of Advanced Metal Materials, Ministry of Education, Anhui University of Technology, Maanshan 243002, PR China

\*Corresponding Authors

E-mail: [ywcheng@ahut.edu.cn](mailto:ywcheng@ahut.edu.cn); [toni-li@163.com](mailto:toni-li@163.com);

#### 1. Calculation details

##### 1.1 Reaction Gibbs free energy of hydrogen adsorption

Under standard conditions, the HER activity of materials can be evaluated by using the reaction Gibbs free energy of hydrogen adsorption ( $\Delta G_{H^*}$ ). <sup>1</sup>  $\Delta G_{H^*}$  is defined as eq (S1),

$$\Delta G_{H^*} = \Delta E_H + \Delta E_{ZPE} - T\Delta S_H \quad (S1)$$

where  $\Delta E_H$ ,  $\Delta E_{ZPE}$  and  $T\Delta S_H$  are the difference of hydrogen adsorption energy, zero-point energy and the entropy between adsorbed hydrogen and hydrogen in the gas phase, respectively. In addition,  $\Delta E_H$ ,  $\Delta E_{ZPE}$  and  $\Delta S_H$  are calculated at 0K temperature, T is set at room temperature (298K). The  $\Delta S_H$  can be regarded as eq (S2),

$$\Delta S_H \cong -\frac{1}{2}S_{H_2}^0 \quad (S2)$$

where  $S_{H_2}^0$  is the entropy of H<sub>2</sub> under the standard conditions. According to the previous studies, <sup>2</sup> it can be found that the vibration entropy of the adsorbed state is very small and can be almost ignored. The values of  $\Delta E_{ZPE}$  and  $T\Delta S$  are referenced from Ref.<sup>3</sup>. Thus, eq (S1) can be rewritten as eq (S3),

$$\Delta G_{H^*} = \Delta E_H + 0.3 \text{ eV} \quad (S3)$$

The overpotential of HER is defined as  $\eta_{HER} = -|\Delta G_{H^*}|/e \times 10^3$  in unit of mV. The optimal  $\Delta G_{H^*}$  is 0 eV, and therefore the corresponding overpotential is 0 mV.<sup>4</sup> Based on the assumption of Nørskov, the theoretical exchange current ( $i_0$ )<sup>5</sup> was calculated to draw the volcano curve of the HER, which is expressed by eq (S4),

$$i_0 = \begin{cases} -ek_0 \frac{1}{1 + \exp(-\Delta G_{H^*}/k_B T)} & \text{for } \Delta G_{H^*} \leq 0 \\ -ek_0 \frac{1}{1 + \exp(\Delta G_{H^*}/k_B T)} & \text{for } \Delta G_{H^*} > 0 \end{cases} \quad (\text{S4})$$

where  $k_0$  and  $k_B$  represent the Boltzmann constant and rate constant, respectively.

### 1.2 Standard free energy for oxygen evolution reaction

When the pH = 0, i.e., in a strongly acidic environment, under standard conditions, the oxygen evolution reaction consists of four electron reaction steps, as follows:

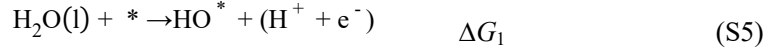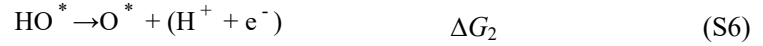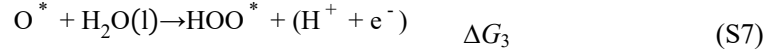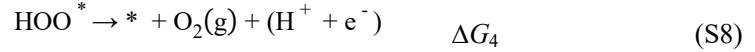

where \* stands for an active site on the surface of catalyst, and O\*, OH\*, and OOH\* are called the adsorbed intermediates, (l) and (g) represent the liquid and gas states, respectively.  $\Delta G_1$ ,  $\Delta G_2$ ,  $\Delta G_3$  and  $\Delta G_4$  are the reaction Gibbs free energy of (S5)-(S8). In the OER process, the OER performance is mainly determined by calculating the reaction free energies of the four elementary steps. For each step, the  $\Delta G$  is obtained via eq (S9):

$$\Delta G = \Delta E + \Delta \text{ZPE} - T\Delta S + \Delta G_U + \Delta G_{pH} \quad (\text{S9})$$

For such electrochemical reactions, the calculations are mainly performed by DFT calculations combined with methods such as the SHE model developed by Nørskov and colleagues.<sup>6</sup> The theoretical overpotential  $\eta_{\text{OER}}$ , can be obtained from the following equation.

$$\eta_{\text{OER}} = \max(\Delta G_1, \Delta G_2, \Delta G_3, \Delta G_4)/e - 1.23[\text{V}] \quad (\text{S10})$$

### 1.3 d-band center

The d-band center ( $\epsilon_d$ )<sup>7</sup> of TM (TM=Fe, Co, and Ni) on the surfaces of the three models is defined as:

$$\epsilon_d = \frac{\int_{-\infty}^{\infty} x d(x) dx}{\int_{-\infty}^{\infty} d(x) dx} \quad (\text{S11})$$

where  $x$  represents the energy level, and  $d(x)$  is the density of states of the  $d$  orbital at the corresponding energy level.

### 1.4 Binding energy

The binding energy ( $E_b$ )<sup>8</sup> of 2D TM/M<sub>2</sub>C MXenes was evaluated by eq (S12),

$$E_b = E_{(TM/M_2C)} - E_{(M_2C)} - E_{(TM)}$$

(S12)

where  $E_{(TM/M_2C)}$ ,  $E_{(M_2C)}$ , and  $E_{(TM)}$  represent the total energies of M<sub>2</sub>C with and without TM loading, and single metal atom, respectively.

## 2. Figures

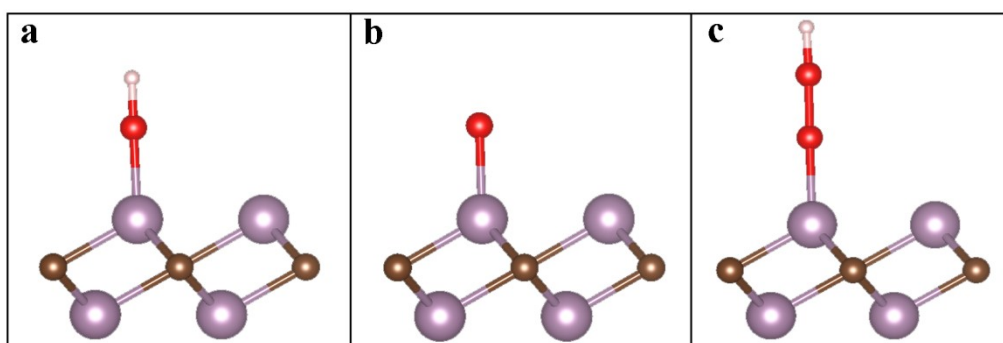

**Figure S1.** Schematic structure of (a) HO\*/Mo<sub>2</sub>C, (b) O\*/Mo<sub>2</sub>C, and (c) HOO\*/Mo<sub>2</sub>C. The purple, brown, red, and white balls represent the Mo, C, O, and H atoms, respectively.

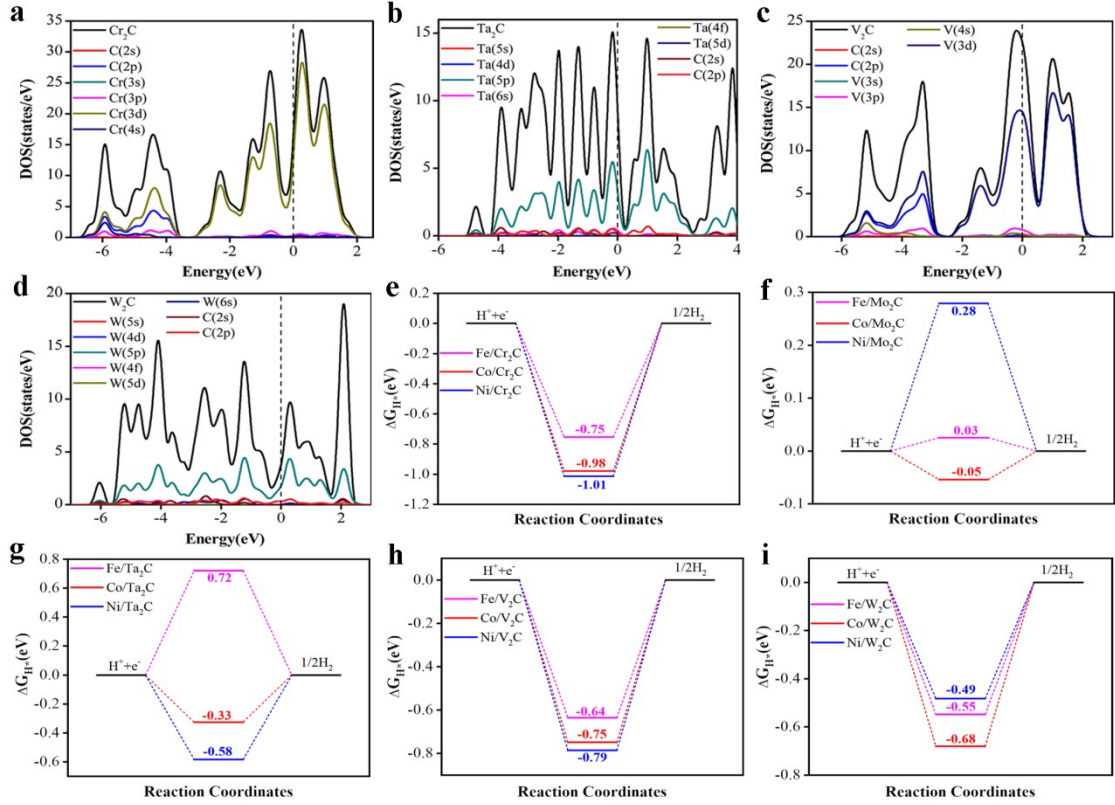

**Figure S2.** Density of states of (a) Cr<sub>2</sub>C, (b) Ta<sub>2</sub>C, (c) V<sub>2</sub>C, and (d) W<sub>2</sub>C. Reaction Gibbs free energy diagrams of hydrogen adsorption ( $\Delta G_{H^*}$ ) of (e) TM/Cr<sub>2</sub>C, (f) TM/Mo<sub>2</sub>C, (g) TM-Ta<sub>2</sub>C, (h) TM/V<sub>2</sub>C, and (i) TM/W<sub>2</sub>C.

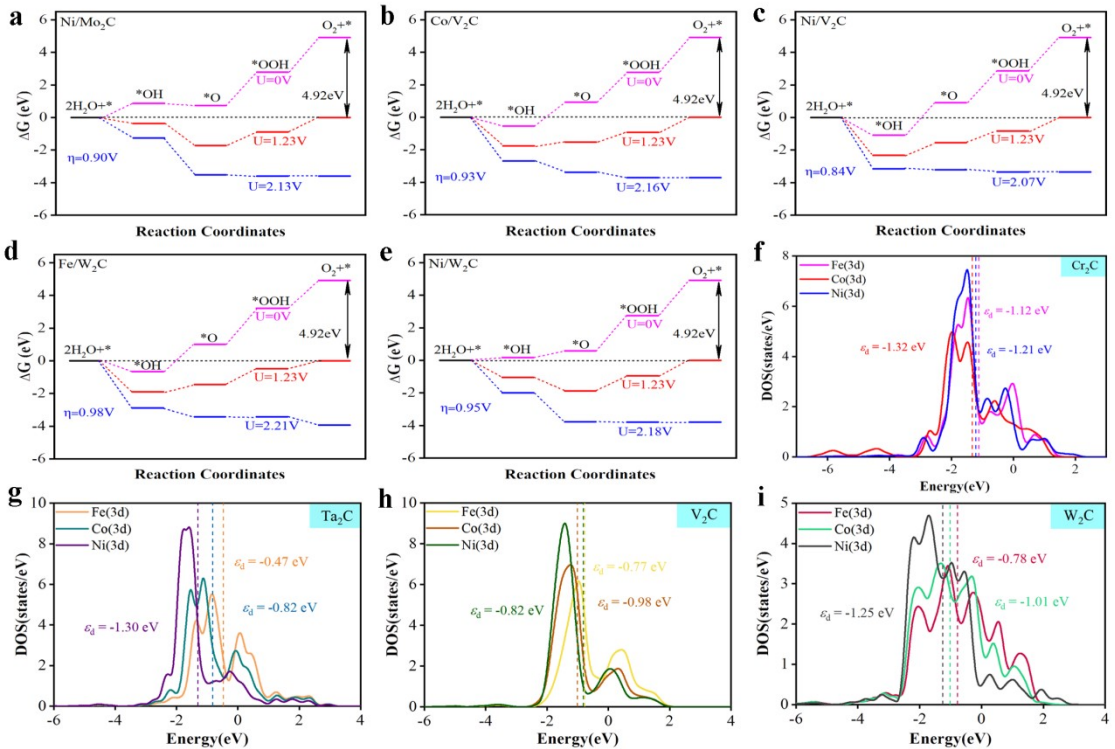

**Figure S3.** Free energy diagrams for OER under different electrode potentials  $U$  (0 V, 1.23 V, and downhill potential for all reaction steps) for (a) Ni/Mo<sub>2</sub>C, (b) Co/V<sub>2</sub>C, (c) Ni/V<sub>2</sub>C, (d) Fe/W<sub>2</sub>C, and (e) Ni/W<sub>2</sub>C. The  $\epsilon_d$  of surface TM atoms in (f) TM/Cr<sub>2</sub>C, (g) TM/Ta<sub>2</sub>C, (h) TM/V<sub>2</sub>C, and (i) TM/W<sub>2</sub>C, respectively.

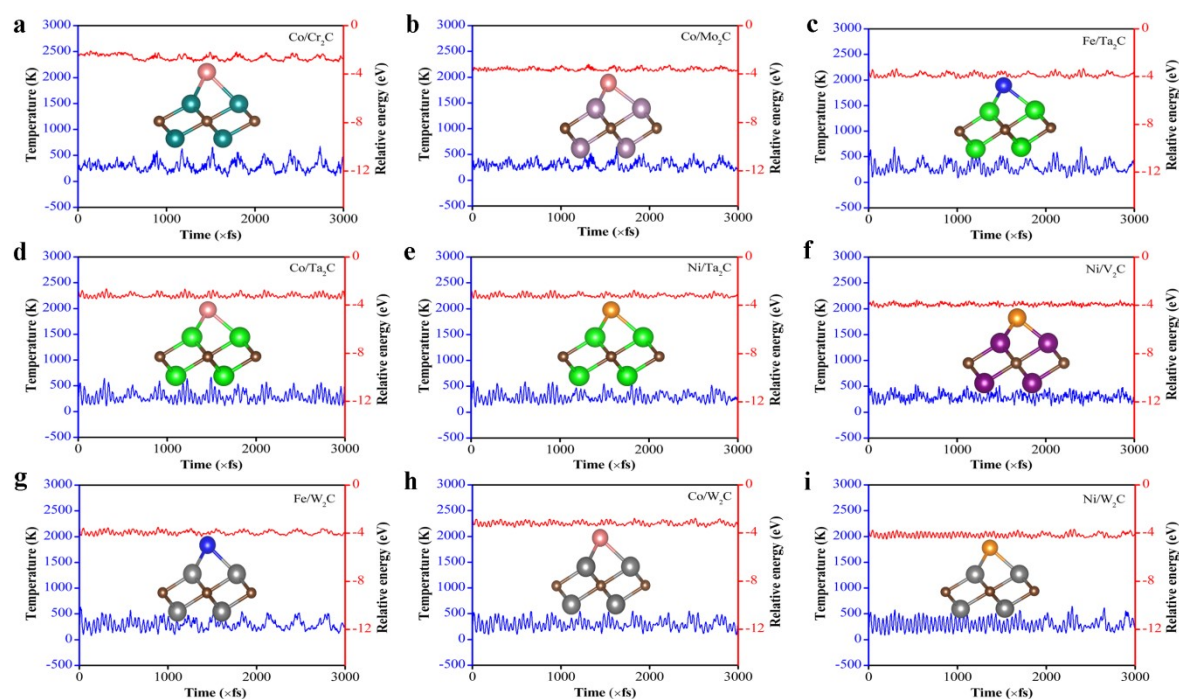

**Figure S4.** The AIMD simulations results of (a) Co/Cr<sub>2</sub>C, (b) Co/Mo<sub>2</sub>C, (c) Fe/Ta<sub>2</sub>C, (d) Co/Ta<sub>2</sub>C, (e) Ni/Ta<sub>2</sub>C, (f) Ni/V<sub>2</sub>C, (g) Fe/W<sub>2</sub>C, (h) Co/W<sub>2</sub>C and (i) Ni/W<sub>2</sub>C.

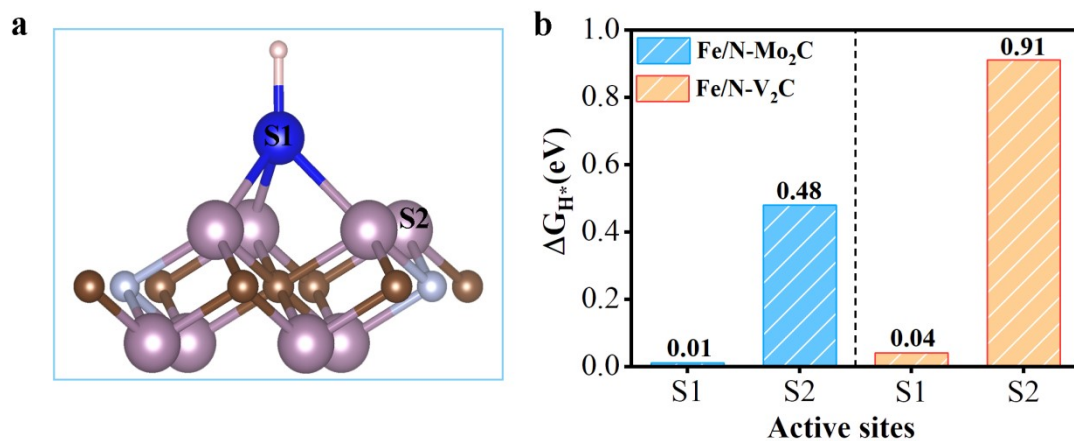

**Figure S5.** (a) Schematic structure of H\* adsorbed on the Fe/N-Mo<sub>2</sub>C surface, where S1 and S2 represent the active sites for H\* adsorption. (b) Reaction Gibbs free energy of hydrogen adsorption ( $\Delta G_{H^*}$ ) on Fe/N-Mo<sub>2</sub>C and Fe/N-V<sub>2</sub>C at S1 and S2 sites.

|              | Cr <sub>2</sub> C | Hf <sub>2</sub> C | Mo <sub>2</sub> C | Nb <sub>2</sub> C | Ta <sub>2</sub> C | Ti <sub>2</sub> C | V <sub>2</sub> C | W <sub>2</sub> C | Zr <sub>2</sub> C |
|--------------|-------------------|-------------------|-------------------|-------------------|-------------------|-------------------|------------------|------------------|-------------------|
| $\theta=1/8$ | -1.10             | -1.24             | -0.15             | -0.59             | -1.28             | -0.84             | -0.94            | -0.60            | -0.92             |
| $\theta=1/4$ | -0.32             | -1.27             | -0.86             | -1.21             | -0.81             | -1.17             | -0.55            | -0.29            | -0.66             |
| $\theta=3/8$ | -0.29             | -1.08             | -0.87             | -0.85             | -0.69             | -1.07             | -0.84            | -0.23            | -1.05             |
| $\theta=1/2$ | -0.16             | -1.14             | -1.18             | -0.79             | -0.46             | -0.94             | -0.76            | -0.08            | -1.09             |

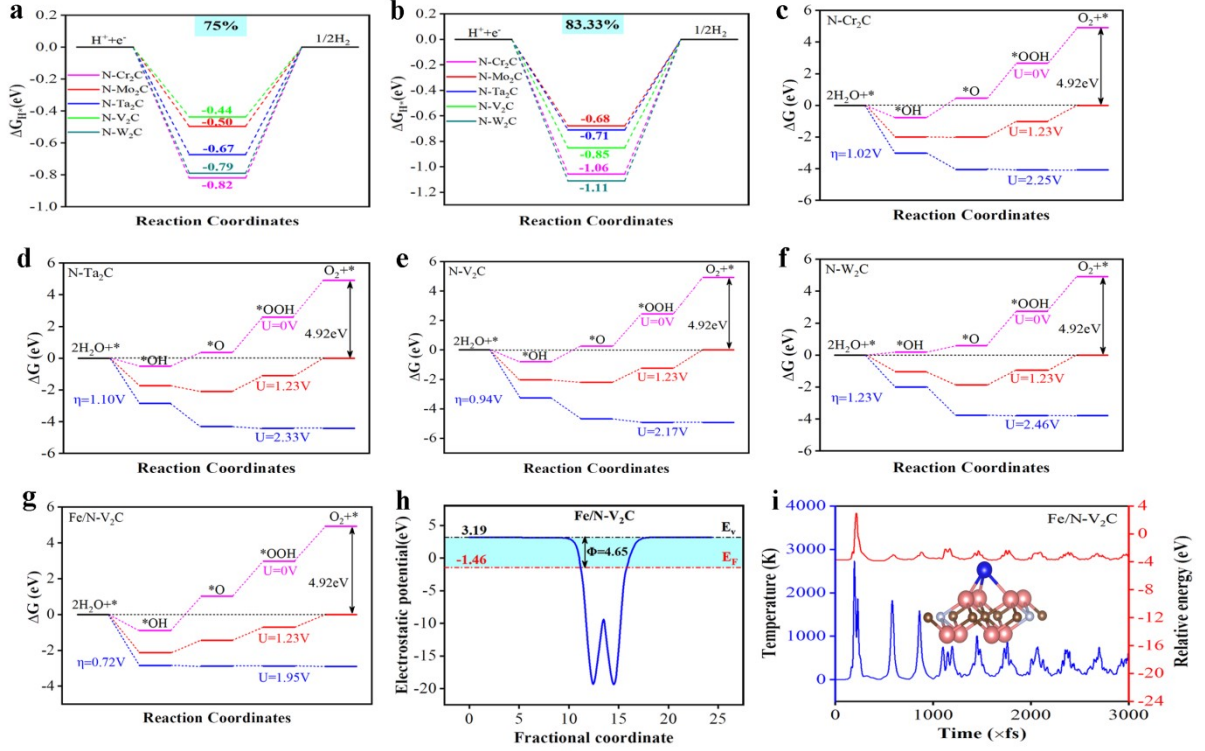

**Figure S6.** Reaction Gibbs free energy diagrams of hydrogen adsorption ( $\Delta G_{H^*}$ ) of (a) N-M<sub>2</sub>C (N-doping concentration of 75%), and (b) N-M<sub>2</sub>C (N-doping concentration of 83.33%). Free energy diagrams for OER under different electrode potentials U (0 V, 1.23 V, and downhill potential for all reaction steps) for (c) N-Cr<sub>2</sub>C, (d) N-Ta<sub>2</sub>C, (e) N-V<sub>2</sub>C, (f) N-W<sub>2</sub>C, and (g) Fe/N-V<sub>2</sub>C. (h) The work function of Fe/N-V<sub>2</sub>C,  $E_F$  and  $E_V$  are the Fermi level and vacuum level, respectively. (i) The AIMD simulations of Fe/N-V<sub>2</sub>C.

**Table S1.** Reaction Gibbs free energy of hydrogen adsorption ( $\Delta G_{H^*}$ , in unit of eV) for bare M<sub>2</sub>C MXenes at different hydrogen coverage ( $\theta=1/8, 1/4, 3/8, \text{ and } 1/2$ ).

**Table S2.** The reaction Gibbs free energy of hydrogen adsorption ( $\Delta G_{H^*}$ ), the overpotential of HER ( $\eta_{HER}$ ), exchange current density ( $\log(i_0/\text{Acm}^{-2})$ ), OH\* adsorption ( $\Delta G_{OH^*}$ ), O\* adsorption ( $\Delta G_{O^*}$ ), OOH\* adsorption ( $\Delta G_{OOH^*}$ ), the overpotential of OER ( $\eta_{OER}$ ), the d-band center ( $\epsilon_d$ ) of TM/M<sub>2</sub>C MXenes.

|                      | $\Delta G_{H^*}/\text{eV}$ | $\eta_{\text{HER}}/\text{mV}$ | $\log(i_0/\text{Acm}^{-2})$ | $\Delta G_{O^*}/\text{eV}$ | $\Delta G_{\text{OH}^*}/\text{eV}$ | $\Delta G_{\text{OOH}^*}/\text{eV}$ | $\eta_{\text{OER}}/\text{V}$ | $\epsilon_d$ |
|----------------------|----------------------------|-------------------------------|-----------------------------|----------------------------|------------------------------------|-------------------------------------|------------------------------|--------------|
| Fe/Cr <sub>2</sub> C | -0.75                      | -750                          | -12.67                      | 0.66                       | -0.43                              | 2.97                                | 1.07                         | -1.12        |
| Co/Cr <sub>2</sub> C | -0.98                      | -980                          | -16.46                      | 0.73                       | -0.59                              | 2.56                                | 1.13                         | -1.32        |
| Ni/Cr <sub>2</sub> C | -1.01                      | -1010                         | -17.02                      | 1.03                       | -0.52                              | 2.48                                | 1.21                         | -1.21        |
| Fe/Mo <sub>2</sub> C | 0.03                       | -30                           | -0.56                       | 1.15                       | -0.67                              | 3.03                                | 0.66                         | -0.88        |
| Co/Mo <sub>2</sub> C | -0.05                      | -50                           | -0.93                       | 0.99                       | -0.22                              | 2.79                                | 0.81                         | -1.09        |
| Ni/Mo <sub>2</sub> C | 0.28                       | -280                          | -4.69                       | 0.74                       | 0.82                               | 3.45                                | 0.90                         | -0.92        |
| Fe/Ta <sub>2</sub> C | 0.72                       | -720                          | -12.09                      | 1.07                       | -0.85                              | 3.16                                | 1.15                         | -0.47        |
| Co/Ta <sub>2</sub> C | -0.33                      | -330                          | -5.48                       | 1.19                       | -0.37                              | 3.27                                | 0.74                         | -0.82        |
| Ni/Ta <sub>2</sub> C | -0.58                      | -580                          | -9.81                       | 0.50                       | 0.13                               | 2.75                                | 1.02                         | -1.3         |
| Fe/V <sub>2</sub> C  | -0.64                      | -640                          | -10.67                      | 0.99                       | 0.62                               | 3.01                                | 0.79                         | -0.77        |
| Co/V <sub>2</sub> C  | -0.75                      | -750                          | -12.58                      | 0.93                       | -0.54                              | 2.76                                | 0.93                         | -0.98        |
| Ni/V <sub>2</sub> C  | -0.79                      | -790                          | -13.19                      | 0.91                       | -1.09                              | 2.85                                | 0.84                         | -0.82        |
| Fe/W <sub>2</sub> C  | -0.55                      | -550                          | -9.21                       | 1.01                       | -0.67                              | 3.21                                | 0.98                         | -0.78        |
| Co/W <sub>2</sub> C  | -0.68                      | -680                          | -11.42                      | 1.15                       | -0.20                              | 2.65                                | 1.04                         | -1.01        |
| Ni/W <sub>2</sub> C  | -0.49                      | -490                          | -8.15                       | 0.59                       | 0.18                               | 2.74                                | 0.95                         | -1.25        |

## References

- 1 J. K. Nørskov, J. Greeley, T. F. Jaramillo, J. Bonde and I. Chorkendorff, *Nat. Mater.*, 2006, **5**, 909-913.
- 2 S. Grimme, J. Antony, S. Ehrlich and H. Krieg, *J. Chem. Phys.*, 2010, **132**, 154104.
- 3 J. R. Kitchin, J. K. Nørskov, M. A. Barteau and J. G. Chen, *J. Chem. Phys.*, 2004, **120**, 10240-10246.
- 4 Z. Meng, B. Zhang, Q. Peng, Y. Yu, J. Zhou and Z. Sun, *Appl. Surf. Sci.*, 2021, **562**, 150151.
- 5 Y. W. Cheng, J. H. Dai, Y. M. Zhang and Y. Song, *J. Phys. Chem. C*, 2018, **122**, 28113-28122.
- 6 J. K. Nørskov, T. Bligaard, J. Rossmeisl and C. H. Christensen, *Nat. Chem.*, 2009, **1**, 37-46.
- 7 J. Xu, Y. Wang, N. Song, S. Luo, B. Xu, J. Zhang and F. Wang, *Phys. Chem. Chem. Phys.*, 2022, **24**, 20988-20997.
- 8 J. Xia, R. Cao, L. Zhao and Q. Wu, *J. Colloid Interface. Sci.*, 2023, **630**, 317-327.
